# Supplementary material for: Decoding motor plans using a closed-loop ultrasonic brain–machine interface
Source: Springer Nature journal article supplement (doi:10.1038/s41593-023-01500-7), 2023-11-30
Supplement: 41593_2023_1500_MOESM2_ESM.pdf [file 41593_2023_1500_MOESM2_ESM.pdf]

## Reporting Summary

Nature Portfolio wishes to improve the reproducibility of the work that we publish. This form provides structure for consistency and transparency in reporting. For further information on Nature Portfolio policies, see our [Editorial Policies](#) and the [Editorial Policy Checklist](#).

### Statistics

For all statistical analyses, confirm that the following items are present in the figure legend, table legend, main text, or Methods section.

n/a Confirmed

- The exact sample size ( $n$ ) for each experimental group/condition, given as a discrete number and unit of measurement
- A statement on whether measurements were taken from distinct samples or whether the same sample was measured repeatedly
- The statistical test(s) used AND whether they are one- or two-sided  
*Only common tests should be described solely by name; describe more complex techniques in the Methods section.*
- A description of all covariates tested
- A description of any assumptions or corrections, such as tests of normality and adjustment for multiple comparisons
- A full description of the statistical parameters including central tendency (e.g. means) or other basic estimates (e.g. regression coefficient) AND variation (e.g. standard deviation) or associated estimates of uncertainty (e.g. confidence intervals)
- For null hypothesis testing, the test statistic (e.g.  $F$ ,  $t$ ,  $r$ ) with confidence intervals, effect sizes, degrees of freedom and  $P$  value noted  
*Give  $P$  values as exact values whenever suitable.*
- For Bayesian analysis, information on the choice of priors and Markov chain Monte Carlo settings
- For hierarchical and complex designs, identification of the appropriate level for tests and full reporting of outcomes
- Estimates of effect sizes (e.g. Cohen's  $d$ , Pearson's  $r$ ), indicating how they were calculated

*Our web collection on [statistics for biologists](#) contains articles on many of the points above.*

### Software and code

Policy information about [availability of computer code](#)

#### Data collection

We used NeuroScan Live software (v0.1; ART INSERM U1273 & Iconeus, Paris, France) interfaced with MATLAB 2019b (MathWorks, Natick, MA, USA) for the functional ultrasound data collection. This data was then streamed to a second MATLAB 2019b instance running the fUS-BMI algorithm (v0.1.0) and saved to disk. This fUS-BMI algorithm is available at [https://github.com/wsgriggs2/rt\\_fUS\\_BMI](https://github.com/wsgriggs2/rt_fUS_BMI) and archived at <https://doi.org/10.5281/zenodo.8414598>.

For behavioral data tracking and collection, we used custom Python 2.7 software based on PsychoPy (v1.90.3). For eyetracking, we used an commercially available EyeLink 1000 system (Ottawa, Canada). For the touchscreen, we used a commercially available Elo IntelliTouch (Milpitas, California).

#### Data analysis

We used MATLAB 2021a for all analyses. Code used to generate key figures and results is available at [https://github.com/wsgriggs2/rt\\_fUS\\_BMI](https://github.com/wsgriggs2/rt_fUS_BMI) and archived at <https://doi.org/10.5281/zenodo.8414598>.

For manuscripts utilizing custom algorithms or software that are central to the research but not yet described in published literature, software must be made available to editors and reviewers. We strongly encourage code deposition in a community repository (e.g. GitHub). See the Nature Portfolio [guidelines for submitting code & software](#) for further information.

## Data

Policy information about [availability of data](#)

All manuscripts must include a [data availability statement](#). This statement should provide the following information, where applicable:

- Accession codes, unique identifiers, or web links for publicly available datasets
- A description of any restrictions on data availability
- For clinical datasets or third party data, please ensure that the statement adheres to our [policy](#)

Key data used in this paper is archived at <https://doi.org/10.22002/pa710-cdn95>.

## Research involving human participants, their data, or biological material

Policy information about studies with [human participants or human data](#). See also policy information about [sex, gender \(identity/presentation\), and sexual orientation](#) and [race, ethnicity and racism](#).

|                                                                    |     |
|--------------------------------------------------------------------|-----|
| Reporting on sex and gender                                        | N/A |
| Reporting on race, ethnicity, or other socially relevant groupings | N/A |
| Population characteristics                                         | N/A |
| Recruitment                                                        | N/A |
| Ethics oversight                                                   | N/A |

Note that full information on the approval of the study protocol must also be provided in the manuscript.

## Field-specific reporting

Please select the one below that is the best fit for your research. If you are not sure, read the appropriate sections before making your selection.

- Life sciences       Behavioural & social sciences       Ecological, evolutionary & environmental sciences

For a reference copy of the document with all sections, see [nature.com/documents/nr-reporting-summary-flat.pdf](https://www.nature.com/documents/nr-reporting-summary-flat.pdf)

## Life sciences study design

All studies must disclose on these points even when the disclosure is negative.

|                 |                                                                                                                                                                                                                                                                                                    |
|-----------------|----------------------------------------------------------------------------------------------------------------------------------------------------------------------------------------------------------------------------------------------------------------------------------------------------|
| Sample size     | We determined the sample size (e.g., number of trials per experimental condition, number of sessions) based upon our lab's experience and standards in the field. This was consistent with our previous studies using a similar motor task (Norman et al. 2021).                                   |
| Data exclusions | No data were excluded from the analysis.                                                                                                                                                                                                                                                           |
| Replication     | We replicated our results in two rhesus monkeys, as widely practiced in the primate research field. We repeated the same task setup for multiple sessions per monkey.                                                                                                                              |
| Randomization   | Randomization of animals to different groups was not relevant for our study. We randomly varied trial parameters, such as length of intertrial interval, to prevent the animals from anticipating task changes, which was important for studying movement planning in our study.                   |
| Blinding        | Blinding was not relevant for our study because the trial parameters were randomly adjusted for each trial and the brain-machine interface operated in a closed-loop fashion without human intervention, i.e., there was no human within the loop to adjust or modify the brain-machine interface. |

## Reporting for specific materials, systems and methods

We require information from authors about some types of materials, experimental systems and methods used in many studies. Here, indicate whether each material, system or method listed is relevant to your study. If you are not sure if a list item applies to your research, read the appropriate section before selecting a response.

## Materials &amp; experimental systems

## Methods

- n/a | Involved in the study
- Antibodies
- Eukaryotic cell lines
- Palaeontology and archaeology
- Animals and other organisms
- Clinical data
- Dual use research of concern
- Plants

- n/a | Involved in the study
- ChIP-seq
- Flow cytometry
- MRI-based neuroimaging

## Animals and other research organisms

Policy information about [studies involving animals](#); [ARRIVE guidelines](#) recommended for reporting animal research, and [Sex and Gender in Research](#)

|                         |                                                                                                                                                                                                                                                                        |
|-------------------------|------------------------------------------------------------------------------------------------------------------------------------------------------------------------------------------------------------------------------------------------------------------------|
| Laboratory animals      | We worked with two healthy 14-year-old male rhesus macaque monkeys ( <i>Macaca mulatta</i> ) weighing 14-17 kg.                                                                                                                                                        |
| Wild animals            | No wild animal were used in this study.                                                                                                                                                                                                                                |
| Reporting on sex        | Both rhesus macaque monkeys were male.                                                                                                                                                                                                                                 |
| Field-collected samples | No field-collected samples were used in this study.                                                                                                                                                                                                                    |
| Ethics oversight        | All training, recording, surgical, and animal care procedures were approved by the California Institute of Technology Institutional Animal Care and Use Committee and complied with the Public Health Service Policy on the Humane Care and Use of Laboratory Animals. |

Note that full information on the approval of the study protocol must also be provided in the manuscript.
